# Supplementary material for: UV photo-mediated size-focusing synthesis of silver nanoclusters
Source: Royal Society of Chemistry journal article supplement (doi:10.1039/c6ra10892j), 2016-01-01
Supplement: c6ra10892j1.pdf [file c6ra10892j1.pdf]

## Electronic Supplementary Information (ESI)

### UV Photo-Mediated Size Focusing Synthesis of Silver Nanoclusters

C. Tominaga<sup>†</sup>, H. Hasegawa<sup>†</sup>, K. Yamashita<sup>†</sup>, R. Arakawa<sup>†</sup> and H. Kawasaki<sup>†\*</sup>

*Faculty of Chemistry, Materials and Bioengineering, Kansai University, 3-3-35 Yamate-cho, Suita 564-8680, Japan.*

*(H.K)Email: [hkawa@kansai-u.ac.jp](mailto:hkawa@kansai-u.ac.jp)*

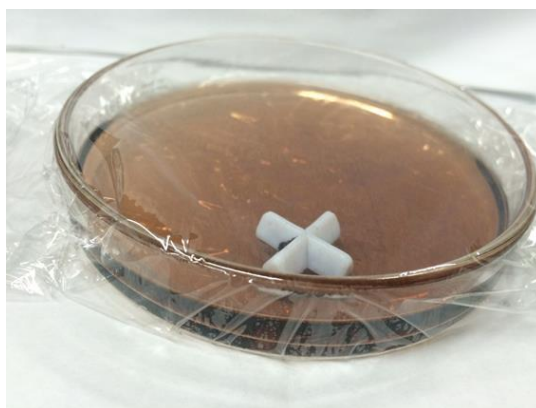

**Fig. S1** Photograph of reaction container in UV photo-mediated size focusing synthesis.

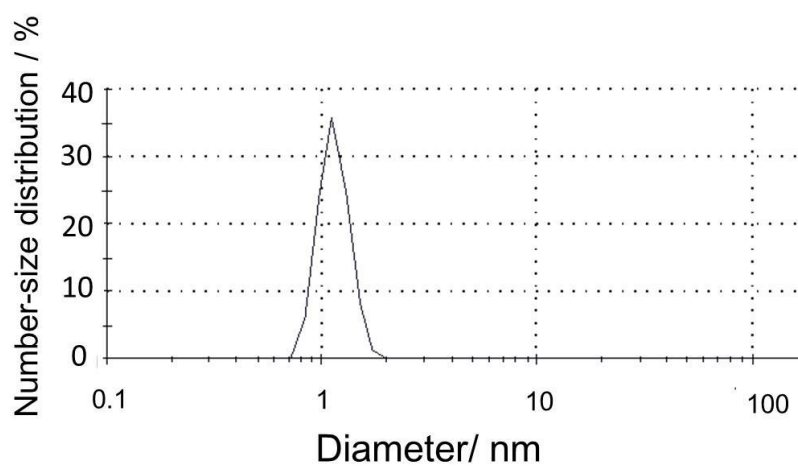

**Fig. S2** Size of the Ag NCs after UV light irradiation for 24 h , measured by Zetasizer Nano ZSP (Malvern).

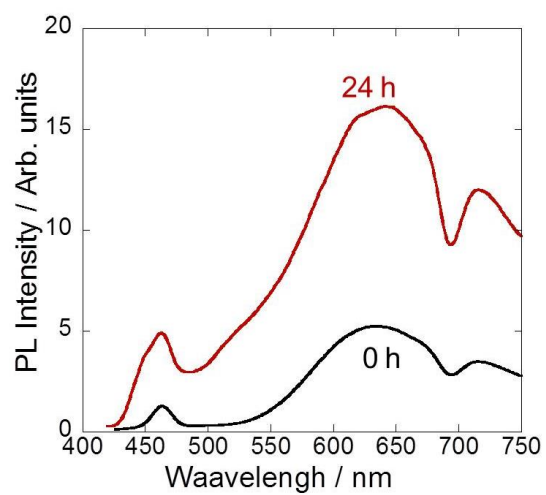

**Fig. S3** Emission spectra of the aqueous solution of Ag NCs on the excitation of 400 nm before (0h) and after 365nm-UV light irradiation for 24 h.
